# Supplementary material
Source: publisher figshare collection journal article supplement (https://diabetesjournals.figshare.com/articles/dataset/_/25674789)
Supplement: Supplementary file 1 [file 1]

Fig. S1: Change in hypoglycemic awareness after 26 weeks according to Clarke score and 5-item hypoglycemic awareness factor (5-item HAF)

- Participants who improved hypoglycemic awareness according to both scores
- Participants who worsened hypoglycemic awareness according to 5-item HAF score but improved awareness according to Clarke score

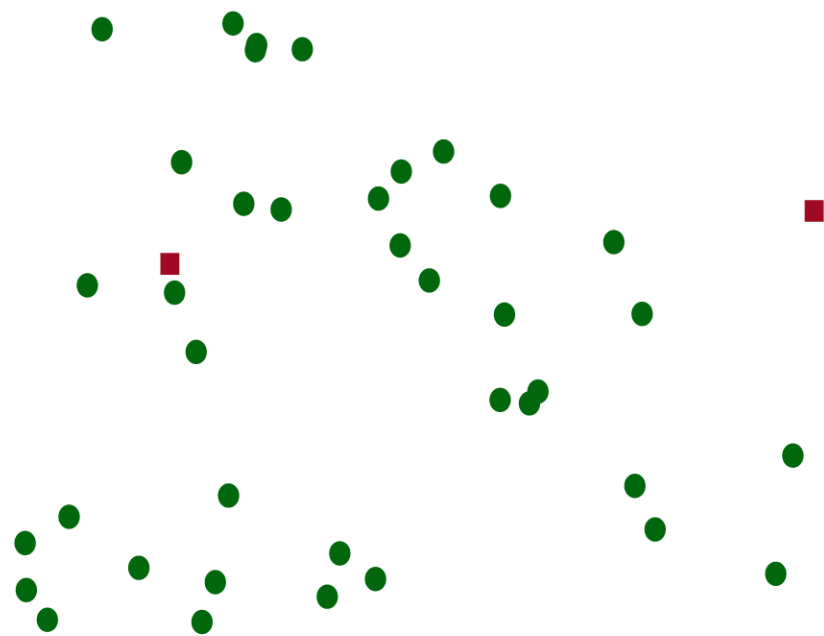

**Number of participants with Improvement of Clarke score (n=40)**  
2/40 improved Clarke score but worsened 5-item hypoglycemic awareness; one participant was randomized to CGM and the other was randomized to BGM

- Participants who worsened hypoglycemic awareness according to both scores
- Participants who improved hypoglycemic awareness according to 5-item HAF but worsened hypoglycemic awareness according to Clarke score

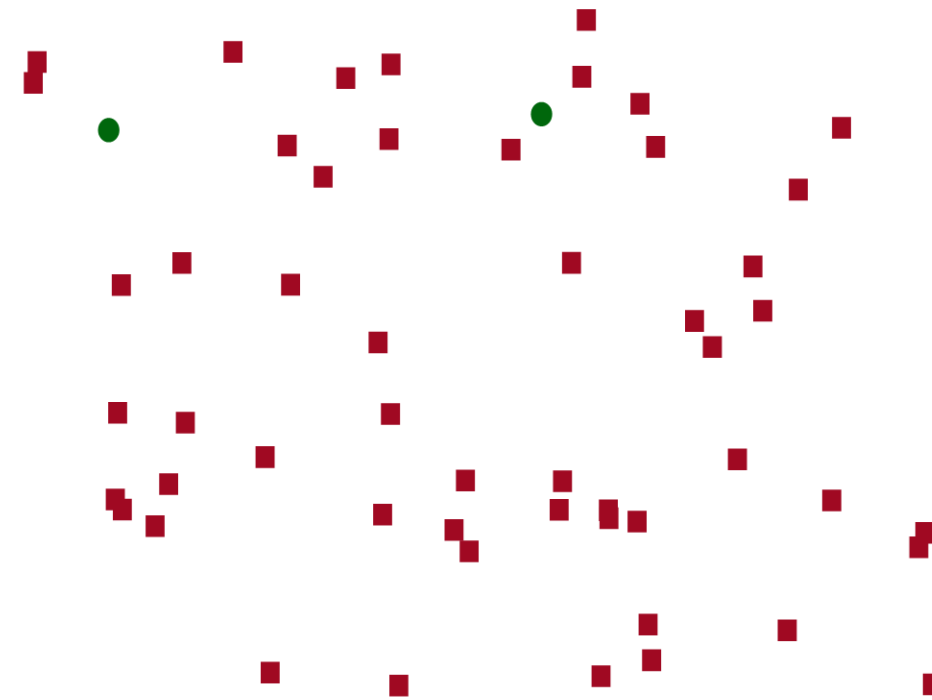

**Number of participants with worsening of Clarke score (n=51)**  
2/51 worsened Clarke score but improved 5-item hypoglycemic awareness; one participant was randomized to CGM and the other was randomized to BGM
