# Supplementary material
Source: publisher figshare collection journal article supplement (https://diabetesjournals.figshare.com/articles/dataset/_/25674789)
Supplement: Supplementary file 2 [file 1]

**Supplementary Appendix: S1:**

| <b>Comorbidities at enrollment</b>                   | <b># of participants</b> | <b>%</b> |
|------------------------------------------------------|--------------------------|----------|
| Hypertension                                         | 123                      | 60.6     |
| Hyperlipidemia                                       | 88                       | 43.3     |
| Thyroid                                              |                          | 0.0      |
| Hypothyroidism                                       |                          |          |
| • Hypothyroidism                                     | 75                       | 36.9     |
| • Hashimoto's disease                                | 4                        | 2.0      |
| • Graves' disease                                    | 2                        | 1.0      |
| Microvascular                                        |                          |          |
| • Retinopathy                                        | 62                       | 30.5     |
| • Neuropathy                                         | 59                       | 29.1     |
| • Nephropathy/Chronic kidney disease                 | 20                       | 9.9      |
| Gastrointestinal                                     | 51                       | 25.1     |
| Depression/Anxiety                                   | 44                       | 21.7     |
| Cardiovascular                                       |                          |          |
| • Coronary artery disease                            | 40                       | 19.7     |
| • Cerebrovascular                                    | 9                        | 4.4      |
| • Peripheral vascular disease                        | 6                        | 3.0      |
| Arthritis                                            | 39                       | 19.2     |
| Osteoporosis/Osteopenia                              | 37                       | 18.2     |
| Cataract/Glaucoma                                    | 36                       | 17.7     |
| Vitamin D deficiency                                 | 32                       | 15.8     |
| Cancer                                               | 27                       | 13.3     |
| Dyslipidemia                                         | 20                       | 9.9      |
| Functional Activities Questionnaire score, No. (%)** |                          |          |
| • < 8                                                | 184                      | 94       |
| • ≥8                                                 | 12                       | 6        |

\*\* Score ranges from 0 to 30, with higher scores reflecting greater dependence in instrumental activities of daily living.

## Supplementary Appendix: S2:

Candidate variables for discriminating between IAH and NAH.

|                                                                                                   |                                                                                                 |
|---------------------------------------------------------------------------------------------------|-------------------------------------------------------------------------------------------------|
| 1. age                                                                                            | 2. gender                                                                                       |
| 3. age at the time of diabetes diagnosis                                                          | 4. duration of diabetes                                                                         |
| 5. detectable C-peptide                                                                           | 6. randomization arm of BGM or CGM                                                              |
| 7. mean glucose, overall                                                                          | 8. mean glucose, daytime                                                                        |
| 9. mean glucose, night-time                                                                       | 10. % of time spent in hypoglycemia of <70 mg/dL, overall                                       |
| 11. % of time spent in hypoglycemia of <70 mg/dL, daytime                                         | 12. % of time spent in hypoglycemia of <70 mg/dL, night-time                                    |
| 13. % of time spent in hypoglycemia of <60 mg/dL, overall                                         | 14. % of time spent in hypoglycemia of <60 mg/dL, daytime                                       |
| 15. % of time spent in hypoglycemia of <70 mg/dL, night-time                                      | 16. % of time spent in hypoglycemia of <54 mg/dL, overall                                       |
| 17. % of time spent in hypoglycemia of <54 mg/dL, daytime                                         | 18. % of time spent in hypoglycemia of <54 mg/dL, night-time                                    |
| 19. % of time spent in range of 70 – 180 mg/dl, overall                                           | 20. % of time spent in range of 70 – 180 mg/dl, daytime                                         |
| 21. % of time spent in range of 70 – 180 mg/dl, night-time                                        | 22. % of time spent in hyperglycemia >180 mg/dl, overall                                        |
| 23. % of time spent in hyperglycemia >180 mg/dl, daytime                                          | 24. % of time spent in hyperglycemia >180 mg/dl, night-time                                     |
| 25. % of time spent in hyperglycemia >250 mg/dl, overall                                          | 26. % of time spent in hyperglycemia >250 mg/dl, daytime                                        |
| 27. % of time spent in hyperglycemia >250 mg/dl, night-time                                       | 28. % of time spent in hyperglycemia >300 mg/dl, overall                                        |
| 29. % of time spent in hyperglycemia >300 mg/dl, daytime                                          | 30. % of time spent in hyperglycemia >300 mg/dl, night-time                                     |
| 31. Hours of CGM data used to calculate metrics, overall                                          | 32. Hours of CGM data used to calculate metrics, daytime                                        |
| 33. Hours of CGM data used to calculate metrics, night-time                                       | 34. Rate of hypoglycemic events (15 or more consecutive minutes <54 mg/dL) per week, overall    |
| 35. Rate of hypoglycemic events (15 or more consecutive minutes <54 mg/dL) per week, daytime      | 36. Rate of hypoglycemic events (15 or more consecutive minutes <54 mg/dL) per week, night-time |
| 37. Rate of hyperglycemic events per week (15 or more consecutive minutes >300 mg/dL), overall    | 38. Rate of hyperglycemic events per week (15 or more consecutive minutes >300 mg/dL), daytime  |
| 39. Rate of hyperglycemic events per week (15 or more consecutive minutes >300 mg/dL), night-time | 40. Coefficient of variation, overall                                                           |
| 41. Coefficient of variation, daytime                                                             | 42. Coefficient of variation, night-time                                                        |

| Candidate variables for discriminating between improvers and non-improvers of IAH |                                                                                                             |
|-----------------------------------------------------------------------------------|-------------------------------------------------------------------------------------------------------------|
| 1. age                                                                            | 2. gender                                                                                                   |
| 3. age at the time of diabetes diagnosis                                          | 4. duration of diabetes                                                                                     |
| 5. detectable C-peptide                                                           | 6. randomization arm of BGM or CGM                                                                          |
| 7. % of time spent in hypoglycemia of <70 mg/dL after 26 weeks, overall           | 8. % of time spent in hypoglycemia of <70 mg/dL after 26 weeks, daytime                                     |
| 9. % of time spent in hypoglycemia of <70 mg/dL after 26 weeks, night-time        | 10. % of time spent in hypoglycemia of <54 mg/dL after 26 weeks, overall                                    |
| 11. % of time spent in hypoglycemia of <54 mg/dL after 26 weeks, daytime          | 12. % of time spent in hypoglycemia of <54 mg/dL after 26 weeks, night-time                                 |
| 13. % of time spent in range of 70 – 180 mg/dl after 26 weeks, overall            | 14. % of time spent in hyperglycemia >180 mg/dl after 26 weeks, overall                                     |
| 15. % of time spent in hyperglycemia >250 mg/dl after 26 weeks, overall           | 16. Rate of hypoglycemic events (15 or more consecutive minutes <54 mg/dL) per week after 26 weeks, overall |
| 17. Coefficient of variation after 26 weeks, overall                              |                                                                                                             |
